# Supplementary material for: Developing microfluidic purification techniques for biodiesel production from recycled grease trap waste
Source: Royal Society of Chemistry journal article supplement (doi:10.1039/d4se00567h), 2024-01-01
Supplement: d4se00567h1.pdf [file d4se00567h1.pdf]

## 1. Appendix

### 1.1. Sulphur measurement

To measure the sulphur concentration using the ICPMS, samples must be diluted following a specific procedure and a calibration curve must be built.

#### Preparation of samples:

Samples were diluted as follows: 0.5g of biodiesel diluted to 50ml (19.7g) ethanol solution. Further dilution might be required for high S samples to ensure that they are within the calibration range. All samples should have a similar dilution factor since different concentration of organic compounds in the biodiesel might influence how the samples are nebulised in the ICPMS and therefore leading to an error in the results. The dilution solution was made by adding 20ml of nitric acid (HNO<sub>3</sub>) and 1ml of indium solution into 1000mL of ethanol. This solution will be used for dilution of all samples and calibrations.

#### Preparation of calibration curve:

Calibration curve was prepared using sulphur-containing biodiesel standards with known concentrations. Each standard is diluted by mixing 1g of biodiesel with 25ml of dilution solution. The concentration of calibration curve for quantification are blank – 0 ppb, 400ppb, 600ppb, 800ppb, 1000ppb, 2000ppb, 4000ppb, 20000ppb.

### 1.2. Batch result

Table S1: Sulphur content measured by ICP-MS for batch and biodiesel model

| Sample     | ID     | Dilution ratio | IPCMS result (ppb) | S content (ppm) |
|------------|--------|----------------|--------------------|-----------------|
| Sulfolane  | Sulf1  | 2500           | 7922.72            | 19806.81        |
| Sulfolane  | Sulf2  | 2500           | 9020.15            | 22550.36        |
| Sulfolane  | Sulf3  | 2500           | 8222.39            | 20555.98        |
| BMIM AICI4 | AICI41 | 100            | 1682.07            | 168.21          |
| BMIM AICI4 | AICI42 | 100            | 2046.21            | 204.62          |
| BMIM AICI4 | AICI43 | 100            | 1269.69            | 126.97          |
| BMIM MSA   | MSA1   | 2500           | 237.27             | 593.19          |
| BMIM MSA   | MSA2   | 2500           | 213.64             | 534.11          |
| BMIM MSA   | MSA3   | 2500           | 152.04             | 380.09          |
| ChCl:Ph    | Ph1    | 100            | 3346.55            | 334.65          |
| ChCl:Ph    | Ph2    | 100            | 2751.66            | 275.17          |
| ChCl:Ph    | Ph3    | 100            | 2944.46            | 294.45          |
| ChCl:PEG   | PEG1   | 100            | 2461.01            | 246.10          |
| ChCl:PEG   | PEG2   | 100            | 2730.58            | 273.06          |
| ChCl:PEG   | PEG3   | 100            | 2840.84            | 284.08          |

|                          |      |     |          |        |
|--------------------------|------|-----|----------|--------|
| <b>Biodiesel raw</b>     | BR1  | 25  | 2116.00  | 52.90  |
| <b>Biodiesel raw</b>     | BR2  | 25  | 1956.00  | 48.90  |
| <b>Biodiesel + 800 S</b> | BS1  | 25  | 30194.00 | 754.85 |
| <b>Biodiesel + 800 S</b> | BS2  | 25  | 34920.00 | 873.00 |
| <b>Biodiesel + 400 S</b> | BSN1 | 100 | 3914.67  | 391.47 |
| <b>Biodiesel + 400 S</b> | BSN2 | 100 | 4010.40  | 401.04 |
| <b>Biodiesel + 400 S</b> | BSN3 | 100 | 3903.49  | 390.35 |

20 **1.3.Optimisation data**

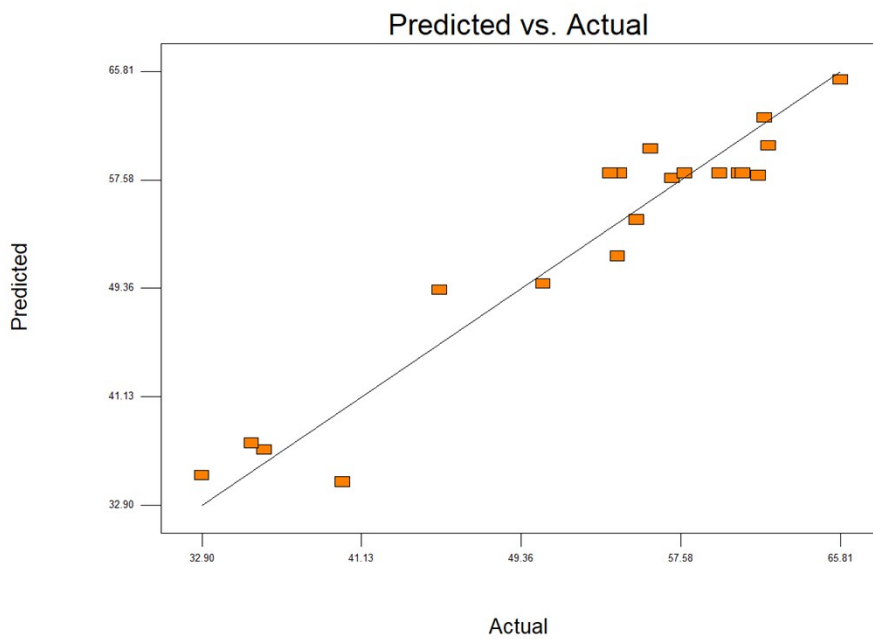

Figure 10: Predicted vs Actual DY%

Table S2: Sulphur content measured by ICP-MS for process optimisation

| <b>Sample</b> | <b>ID</b> | <b>Dilution ratio</b> | <b>IPCMS result (ppb)</b> | <b>Sulphur content (ppm)</b> |
|---------------|-----------|-----------------------|---------------------------|------------------------------|
| <b>Run 1</b>  | 1.1       | 50                    | 3530.47                   | 176.52                       |
| <b>Run 1</b>  | 1.2       | 50                    | 3532.64                   | 176.63                       |
| <b>Run 1</b>  | 1.3       | 50                    | 3501.56                   | 175.08                       |
| <b>Run 2</b>  | 2.1       | 50                    | 3744.28                   | 187.21                       |
| <b>Run 2</b>  | 2.2       | 50                    | 3368.46                   | 168.42                       |
| <b>Run 2</b>  | 2.3       | 50                    | 3772.19                   | 188.61                       |
| <b>Run 3</b>  | 3.1       | 50                    | 3434.65                   | 171.73                       |
| <b>Run 3</b>  | 3.2       | 50                    | 3386.16                   | 169.31                       |

---

|               |      |    |         |        |
|---------------|------|----|---------|--------|
| <b>Run 3</b>  | 3.3  | 50 | 3161.92 | 158.10 |
| <b>Run 4</b>  | 4.1  | 50 | 2854.26 | 142.71 |
| <b>Run 4</b>  | 4.2  | 50 | 3506.92 | 175.35 |
| <b>Run 4</b>  | 4.3  | 50 | 2910.96 | 145.55 |
| <b>Run 5</b>  | 5.1  | 50 | 3123.63 | 156.18 |
| <b>Run 5</b>  | 5.2  | 50 | 3371.74 | 168.59 |
| <b>Run 5</b>  | 5.3  | 50 | 3062.01 | 153.10 |
| <b>Run 6</b>  | 6.1  | 50 | 3293.65 | 164.68 |
| <b>Run 6</b>  | 6.2  | 50 | 2862.07 | 143.10 |
| <b>Run 6</b>  | 6.3  | 50 | 2800.01 | 140.00 |
| <b>Run 7</b>  | 7.1  | 50 | 3528.02 | 176.40 |
| <b>Run 7</b>  | 7.2  | 50 | 3542.79 | 177.14 |
| <b>Run 7</b>  | 7.3  | 50 | 3320.51 | 166.03 |
| <b>Run 8</b>  | 8.1  | 50 | 2603.06 | 130.15 |
| <b>Run 8</b>  | 8.2  | 50 | 2745.14 | 137.26 |
| <b>Run 8</b>  | 8.3  | 50 | 2735.02 | 136.75 |
| <b>Run 9</b>  | 9.1  | 50 | 5201.15 | 260.06 |
| <b>Run 9</b>  | 9.2  | 50 | 5263.83 | 263.19 |
| <b>Run 9</b>  | 9.3  | 50 | 5398.01 | 269.90 |
| <b>Run 10</b> | 10.1 | 50 | 3633.48 | 181.67 |
| <b>Run 10</b> | 10.2 | 50 | 4228.38 | 211.42 |
| <b>Run 10</b> | 10.3 | 50 | 3841.69 | 192.08 |
| <b>Run 11</b> | 11.1 | 50 | 5474.47 | 273.72 |
| <b>Run 11</b> | 11.2 | 50 | 5206.21 | 260.31 |
| <b>Run 11</b> | 11.3 | 50 | 4575.42 | 228.77 |
| <b>Run 12</b> | 12.1 | 50 | 3758.52 | 187.93 |
| <b>Run 12</b> | 12.2 | 50 | 3326.34 | 166.32 |
| <b>Run 12</b> | 12.3 | 50 | 3712.68 | 185.63 |
| <b>Run 13</b> | 13.1 | 50 | 3591.38 | 179.57 |
| <b>Run 13</b> | 13.2 | 50 | 3591.38 | 179.57 |
| <b>Run 13</b> | 13.3 | 50 | 3591.38 | 179.57 |
| <b>Run 14</b> | 14.1 | 50 | 4198.75 | 209.94 |
| <b>Run 14</b> | 14.2 | 50 | 4441.67 | 222.08 |

---

---

|               |      |    |         |        |
|---------------|------|----|---------|--------|
| <b>Run 15</b> | 15.1 | 50 | 4320.21 | 216.01 |
| <b>Run 15</b> | 15.2 | 50 | 5130.76 | 256.54 |
| <b>Run 15</b> | 15.3 | 50 | 4566.87 | 228.34 |
| <b>Run 16</b> | 16.1 | 50 | 2815.57 | 140.78 |
| <b>Run 16</b> | 16.2 | 50 | 2876.34 | 143.82 |
| <b>Run 16</b> | 16.3 | 50 | 3389.71 | 169.49 |
| <b>Run 17</b> | 17.1 | 50 | 3103.09 | 155.15 |
| <b>Run 17</b> | 17.2 | 50 | 2907.95 | 145.40 |
| <b>Run 17</b> | 17.3 | 50 | 2995.61 | 149.78 |
| <b>Run 18</b> | 18.1 | 50 | 4619.40 | 230.97 |
| <b>Run 18</b> | 18.2 | 50 | 4596.58 | 229.83 |
| <b>Run 18</b> | 18.3 | 50 | 4245.59 | 212.28 |
| <b>Run 19</b> | 19.1 | 50 | 3391.45 | 169.57 |
| <b>Run 19</b> | 19.2 | 50 | 3634.00 | 181.70 |
| <b>Run 19</b> | 19.3 | 50 | 3106.89 | 155.34 |
| <b>Run 20</b> | 20.1 | 50 | 3162.57 | 158.13 |
| <b>Run 20</b> | 20.2 | 50 | 3044.11 | 152.21 |
| <b>Run 20</b> | 20.3 | 50 | 3114.98 | 155.75 |
| <b>Run 21</b> | 21.1 | 50 | 2892.69 | 144.63 |
| <b>Run 21</b> | 21.2 | 50 | 2980.21 | 149.01 |
| <b>Run 21</b> | 21.3 | 50 | 2727.42 | 136.37 |
| <b>Run 22</b> | 22.1 | 50 | 2415.95 | 120.80 |
| <b>Run 22</b> | 22.2 | 50 | 2296.60 | 114.83 |
| <b>Run 22</b> | 22.3 | 50 | 2534.52 | 126.73 |

---

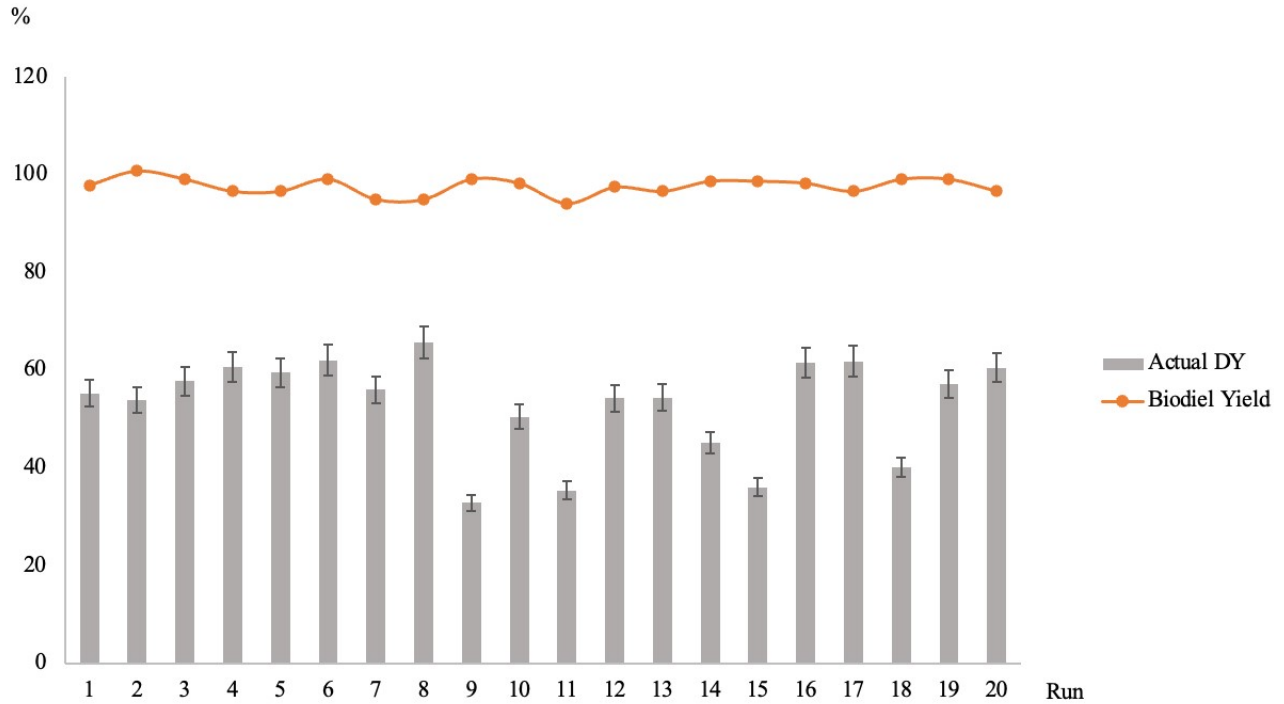

25

Figure 11: Diagram Actual DY and Biodiesel yield for 20 runs.

Table S3: Sequential model sum of square

| Source           | Sum of Squares | DF       | Mean Square   | F Value     | Prob > F      |                  |
|------------------|----------------|----------|---------------|-------------|---------------|------------------|
| Mean             | 56349.73       | 1        | 56349.73      |             |               |                  |
| Linear           | 846.14         | 3        | 282.05        | 4.5         | 0.018         |                  |
| 2FI              | 480.58         | 3        | 160.19        | 3.99        | 0.0324        |                  |
| <b>Quadratic</b> | <b>377.84</b>  | <b>3</b> | <b>125.95</b> | <b>8.71</b> | <b>0.0039</b> | <b>Suggested</b> |
| Cubic            | 91.72          | 4        | 2.93          | 2.6         | 0.1419        | Aliased          |
| Residual         | 52.86          | 6        | 8.81          |             |               |                  |
| Total            | 58198.86       | 20       | 2909.94       |             |               |                  |

Table S4: Lack of fit

| Source           | Sum of Squares | DF       | Mean Square  | F Value     | Prob > F      |                  |
|------------------|----------------|----------|--------------|-------------|---------------|------------------|
| Linear           | 957.15         | 11       | 87.01        | 9.49        | 0.0112        |                  |
| 2FI              | 476.57         | 8        | 59.57        | 6.5         | 0.0272        |                  |
| <b>Quadratic</b> | <b>931</b>     | <b>5</b> | <b>19.75</b> | <b>2.15</b> | <b>0.2299</b> | <b>Suggested</b> |
| Cubic            | 7.01           | 1        | 7.01         | 0.76        | 0.4219        | Aliased          |
| Pure Error       | 45.84          | 5        | 9.17         |             |               |                  |

30

Table S5: Model summary statistics.

| Source           | Std. Dev.  | R-Squared     | Adjusted R-Squared | Predicted R-Squared | PRESS         |                  |
|------------------|------------|---------------|--------------------|---------------------|---------------|------------------|
| Linear           | 7.92       | 0.4576        | 0.3559             | 0.0802              | 1700.79       |                  |
| 2FI              | 6.34       | 0.7175        | 0.5871             | 0.3432              | 1214.6        |                  |
| <u>Quadratic</u> | <u>3.8</u> | <u>0.9218</u> | <u>0.8515</u>      | <u>0.5521</u>       | <u>828.17</u> | <u>Suggested</u> |
| Cubic            | 2.97       | 0.9714        | 0.9095             | 0.1862              | 1504.76       | Aliased          |
